# Supplementary material for: Tracking the introduction and spread of SARS-CoV-2 in coastal Kenya
Source: bioRxiv or medRxiv preprint supplement (doi:10.1101/2020.10.05.20206730), 2020-10-07

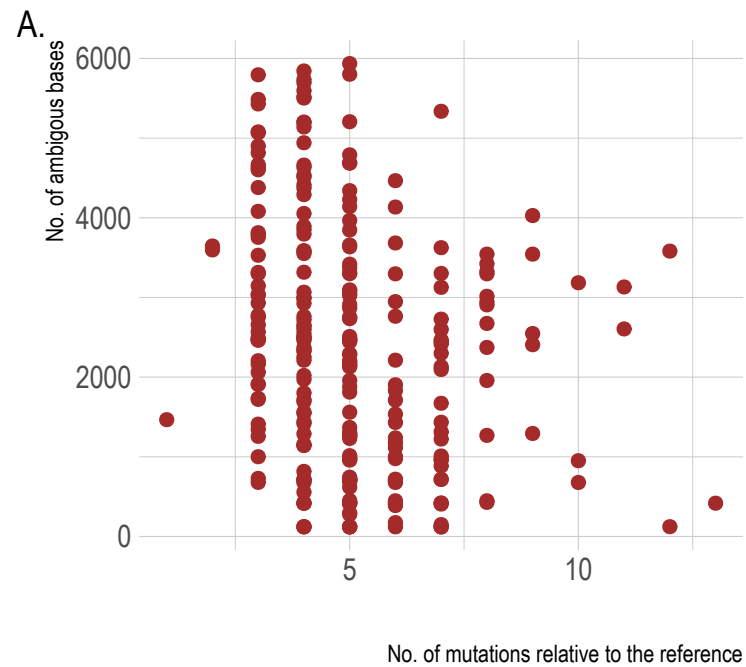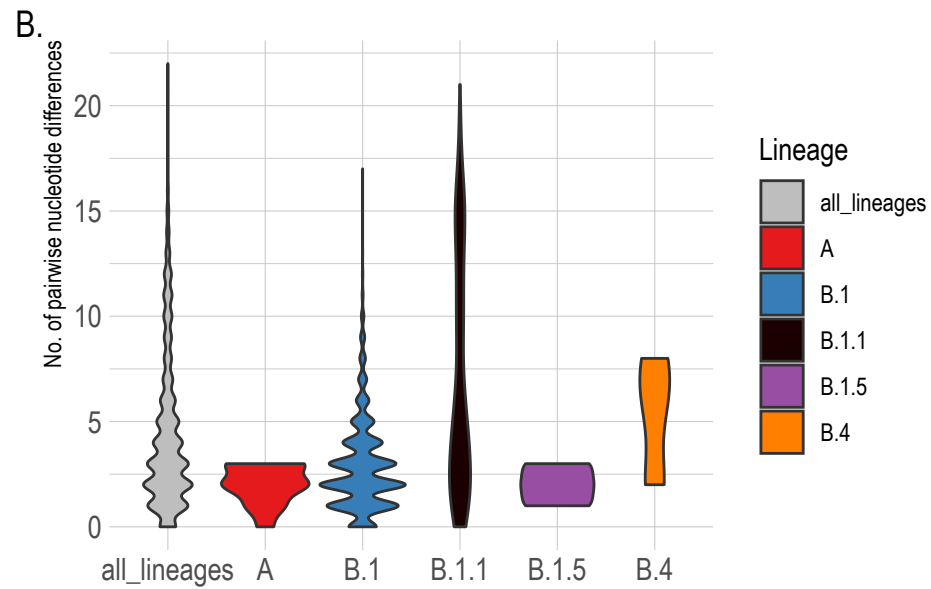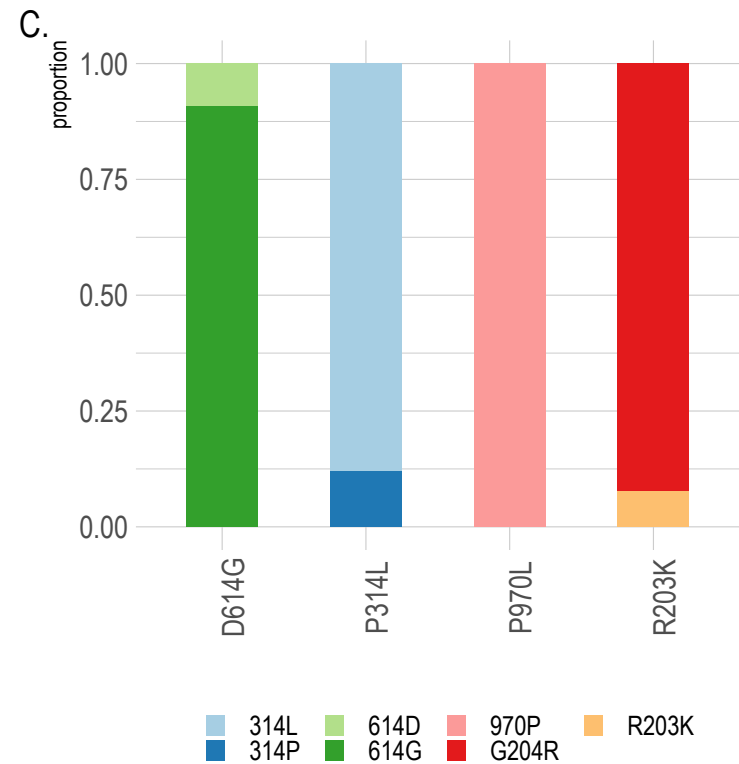

Supplement: Supplementary file [file media-2.pdf]
